1 **Predator-induced shell plasticity in mussels hinders predation by**  
2 **drilling snails**

3 Zachary T. Sherker, Julius A. Ellrich, Ricardo A. Scrosati \*

4 St. Francis Xavier University, Department of Biology, Antigonish, Nova Scotia B2G 2W5,

5 Canada

6 \* Corresponding author. Email: [rscrosat@stfx.ca](mailto:rscrosat@stfx.ca)

7 Running page head: Predator nonconsumptive effects on prey

8

8 ABSTRACT: Sessile invertebrate prey that detect waterborne predator cues often respond by  
9 strengthening their structural defenses. Experimental evidence of the functional significance of  
10 such modifications using field-raised organisms is lacking. This study addresses that gap using  
11 intertidal mussels and predatory dogwhelks from Atlantic Canada. During the spring and  
12 summer of 2016, we ran a field experiment that manipulated dogwhelk presence to test their  
13 nonconsumptive effects on mussel traits. Dogwhelk cues elicited thickening at the lip, centre,  
14 and base of mussel shells, although simultaneously limiting shell growth in length. As shell mass  
15 was unaffected by dogwhelk presence, a trade-off between shell thickening and elongation was  
16 revealed. Thickening was strongest at the thinnest parts of the shell. Using the field-raised  
17 organisms, a lab experiment found that dogwhelks took, on average, 55 % longer to drill and  
18 consume mussels previously exposed to dogwhelk cues than mussels grown without such a cue  
19 exposure. Dogwhelks drilled at the thinnest parts of the shell but, nonetheless, the consumed  
20 cue-exposed mussels had thicker shells at the borehole than the consumed mussels not exposed  
21 to cues, which likely explains the observed difference in handling time. As handling time  
22 normally decreases predation success, this study indicates that the plastic structural modifications  
23 in mussels triggered by dogwhelk cues in the field hinder predation by these drilling predators.

24 KEY WORDS: Dogwhelk · Intertidal · Mussel · *Mytilus* · Nonconsumptive predator effect ·  
25 *Nucella* · Phenotypic plasticity

26

26 **INTRODUCTION**

27 Nonconsumptive effects (NCEs) of predators on prey mediated by chemical cues are  
28 ubiquitous in aquatic systems (Ferrari et al. 2010, Brönmark & Hansson 2012). For example,  
29 when aquatic prey detect waterborne predator cues, short-term responses often include  
30 behavioural changes such as moving away or reducing feeding activities to decrease predation  
31 risk (Keppel & Scrosati 2004, Molis et al. 2011). Longer-term responses include the  
32 phenotypically plastic strengthening of morphological defenses, especially in prey with little or  
33 no escape capabilities, such as slow-moving and sessile species (Leonard et al. 1999, Nakaoka  
34 2000, Freeman & Byers 2006). Predator NCEs may ultimately influence prey demography  
35 (Ellrich et al. 2015) and, indirectly, the abundance of other species in the community (Weissburg  
36 et al. 2014, Matassa et al. 2016). Thus, NCE research has become an important part of ecology.  
37 The present contribution investigates the functional significance of structural changes in sessile  
38 prey that are triggered by waterborne predator cues.

39 Morphological changes in shell-bearing invertebrate prey can be induced by waterborne  
40 cues from predatory snails, crabs, and sea stars (Reimer & Tedengren 1996, Smith & Jennings  
41 2000, Cheung et al. 2004, Freeman 2007, Newell et al. 2007, Lord & Whitlatch 2012, Lowen et  
42 al. 2013, Robinson et al. 2014, Babarro et al. 2016). For some cases, experimental evidence  
43 indicates that such modifications increase the resistance to predation (Boulding 1984, Norberg &  
44 Tedengren 1995, Reimer & Tedengren 1996, Freeman 2007, Newell et al. 2007, Robinson et al.  
45 2014). Mussels have been useful model systems in this regard. For example, when exposed to  
46 cues from sea stars, mussels develop thicker and more rounded shells, stronger adductor muscles,  
47 and more byssal threads (Côté 1995, Reimer & Tedengren 1997, Leonard et al. 1999, Reimer &  
48 Harms-Ringdahl 2001, Freeman & Byers 2006, Freeman 2007, Shin et al. 2009, Lowen et al.

49 2013). Live-feeding experiments have shown that those responses improve mussel survival and  
50 increase the time and energy required for sea stars to pry open mussels (Norberg & Tedengren  
51 1995, Reimer & Tedengren 1996, 1997, Freeman 2007, Lowen et al. 2013). When exposed to  
52 crab cues, mussels increase shell thickness –sometimes at the expense of shell elongation–  
53 (Leonard et al. 1999, Caro & Castilla 2004, Cheung et al. 2004, Freeman & Byers 2006,  
54 Freeman 2007, Shin et al. 2009, Lowen et al. 2013, Naddafi & Rudstam 2014) and reinforce  
55 attachment to the substrate (Wang et al. 2010, Lowen et al. 2013). Shell thickening increases the  
56 handling time and force required for crabs to crush and consume a mussel (Boulding 1984,  
57 Leonard et al. 1999, Freeman 2007).

58       Drilling predators, such as many snail species, are also common predators of mussels  
59 worldwide. When exposed to cues from such predators, mussels also respond by thickening their  
60 shells (Smith & Jennings 2000, Cheung et al. 2004, Freeman 2007, Babarro et al. 2016).  
61 However, whether such modifications improve the ability of mussels to cope with drilling  
62 predators has not been experimentally evaluated as yet. Moreover, the studies that have shown  
63 that predator-induced morphological plasticity in bivalves hampers predation were done using  
64 lab-reared organisms, which is a less realistic approach than using organisms raised under natural  
65 conditions (Weissburg et al. 2014). To address these knowledge gaps, we conducted experiments  
66 using intertidal mussels and dogwhelks from Atlantic Canada. First, we tested the hypothesis  
67 that, in the presence of waterborne dogwhelk cues in the field, mussels would thicken their shells  
68 but grow less in length. Then, assuming the predicted shell thickening, we tested the hypothesis  
69 that the handling time required by dogwhelks to prey upon mussels would be higher when  
70 consuming mussels that were previously exposed to dogwhelk cues in the field.

71

71 **MATERIALS AND METHODS**

72 **Effects of dogwhelk cues on mussel traits**

73 To evaluate the effects of dogwhelk cues on mussel traits, we did a field experiment in  
74 rocky intertidal habitats from Deming Island (between 45° 12' 41" N, 61° 10' 50" W and 45° 12'  
75 45" N, 61° 10' 26" W), Nova Scotia, Canada, during the spring and summer of 2016. The  
76 substrate of the studied habitats is stable bedrock. Maximum water velocity measured with  
77 dynamometers (Bell & Denny 1994) in these habitats was  $6.0 \pm 0.4 \text{ m s}^{-1}$  (mean  $\pm$  SE,  $n = 24$ ),  
78 indicating that wave exposure was moderate, as values can reach  $12 \text{ m s}^{-1}$  at exposed sites in  
79 Nova Scotia (Hunt & Scheibling 2001). Intertidal temperature measured every 30 min during the  
80 study period with Hobo Pendant loggers (Onset Computer Corp., Pocasset, MA, USA) attached  
81 to the substrate was  $14.2 \pm 0.1 \text{ }^\circ\text{C}$  ( $n = 9$  loggers). Seawater salinity measured with a handheld  
82 RF20 refractometer (Extech Instruments, Boston, MA, USA) was 35 ‰. We used *Nucella*  
83 *lapillus*, which is the only local intertidal dogwhelk (Scrosati & Heaven 2007), and *Mytilus*  
84 *edulis* and *M. trossulus*, which are the two local intertidal mussels and an important prey item for  
85 dogwhelks (Largen 1967). It is highly difficult to visually identify both mussels because of  
86 morphological similarities. However, recent genetic studies have revealed that *M. trossulus*  
87 predominates over *M. edulis* in moderately exposed habitats on this coast (Tam & Scrosati  
88 2014). Thus, given that we collected mussels at random for this study, our samples likely  
89 exhibited a predominance of *M. trossulus* over *M. edulis*.

90 We evaluated dogwhelk cue effects on mussel traits by manipulating dogwhelk presence in  
91 cages attached to the intertidal substrate. Each cage (Fig. 1) was made of a PVC ring (25 cm in  
92 diameter and 2.5 cm tall) and plastic mesh (0.5 cm x 0.5 cm of opening size). Each cage was  
93 divided by mesh into a central compartment (12 cm x 12 cm) and a peripheral compartment (area

94 = 347 cm<sup>2</sup>). We used the peripheral compartment to create two dogwhelk treatments: either 10  
95 enclosed dogwhelks ( $2.23 \pm 0.02$  cm long,  $n = 104$ ) or none. The used dogwhelk density (ca. 3  
96 individuals dm<sup>-2</sup>) was representative of the studied coast (Ellrich & Scrosati 2016). The central  
97 compartment of each cage contained a conical mesh compartment (6 cm in base diameter and 2.5  
98 cm tall) that enclosed two mussels ( $1.86 \pm 0.01$  cm,  $n = 120$ ) and, left to attach freely around the  
99 conical compartment, 18 mussels ( $3.5 \pm 0.1$  cm long,  $n = 30$ ) to simulate a natural mussel patch.  
100 One of the two mussels in the conical compartment was eventually used to take the growth  
101 measurements, while the other mussel was used for the lab experiment on handling time  
102 described below. The size of the enclosed mussels is favourable for dogwhelk predation (Hughes  
103 & Dunkin 1984), which suggested that it was also suitable to detect NCEs. The cages were  
104 attached to the substrate with screws and PVC tiles, previously removing seaweeds and  
105 invertebrates to prevent potential influences (Beermann et al. 2013). Any dogwhelks found near  
106 the cages during the experiment were also periodically removed.

107       The experiment was arranged as a randomized complete block design with replicated  
108 treatments within blocks (Quinn & Keough 2002). We established 15 blocks at an intertidal  
109 elevation of  $0.99 \pm 0.04$  m above chart datum, or lowest normal tide (the tidal range is 1.8 m).  
110 Each block included two replicates of each of the two dogwhelk treatments, thus yielding a total  
111 of 60 cages (30 cages per dogwhelk treatment). We started the experiment on 6 June 2016.  
112 During the experiment, we did not feed the caged dogwhelks but, to prevent their starvation, we  
113 replaced them every 10 days with mussel-fed dogwhelks kept in separate cages nearby. We used  
114 mussel-fed dogwhelks to elicit strong responses in the experimental mussels, as prey often reacts  
115 most strongly to cues from predators fed conspecific prey (Hagen et al. 2002, Schoeppner &

116 Relyea 2005, Weissburg & Beauvais 2015). We ended the experiment on 16 August 2016, time  
117 at which we transported the mussels from the conical mesh compartments to the laboratory.

118 In the laboratory, we randomly selected one of the two mussels from each conical  
119 compartment for measurements. For each selected mussel, we measured shell length to the  
120 nearest 0.01 mm using a digital vernier caliper. Since we had also measured shell length at the  
121 beginning of the experiment (marking one of the two mussels in each conical compartment with  
122 nail polish for later identification), we measured relative length increment as  $[(L_f - L_i)/L_i]$ , where  
123  $L_f$  was final length and  $L_i$  was initial length. Using a vernier caliper modified with metal  
124 extensions attached to the tip of each caliper jaw, we also measured shell thickness at the lip  
125 (1 mm from the apex), centre, and base (1 mm from the base) of the right valve (looking from a  
126 dorsal view) of each mussel. Then, we dried the mussels at 50 °C for 72 hours. After that, we  
127 separated the soft tissues from the shells and measured shell mass and soft tissue dry mass to the  
128 nearest 0.1 mg.

### 129 **Effects of mussel shell thickness on dogwhelk handling time**

130 To evaluate the effects of mussel shell thickness on dogwhelk handling time, we did a lab  
131 experiment based on the finding (see Results) that shells thickened in the presence of dogwhelk  
132 cues in the field. For the lab experiment, we used from each conical compartment the mussel that  
133 was not used for the measurements described above. Because some mussels died during the field  
134 experiment, we used 26 mussels from the dogwhelk-presence treatment and 22 mussels from the  
135 no-dogwhelk treatment. We started the lab experiment on 17 August 2016, having kept the  
136 mussels overnight since collected from the field in a culture room at 17 °C (water temperature on  
137 the studied coast in August). We placed each of the 48 mussels in a separate container with 250  
138 ml of seawater. We then secured with epoxy glue the left valve of each mussel to a PVC tile at

139 the bottom of each container, leaving the right valve facing upwards, exposed to predation. We  
140 selected the right valve because whelks bore the right valve more often than the left (Alexander  
141 et al. 2015). We allowed the glue to harden overnight and, then, we placed one dogwhelk ( $2.22 \pm$   
142  $0.01$  cm long,  $n = 48$ ) in each container. The dogwhelks had been previously starved for 10 days  
143 to standardize starvation level, which could have otherwise affected their feeding rate (Hughes &  
144 Drewett 1985, Bayne & Scullard 1978). We attached a GoPro Hero4 Black camera (GoPro, San  
145 Mateo, CA, USA) to the ceiling of the culture room to take pictures of the entire set of containers  
146 every 30 sec. We checked the containers every two hours and changed their seawater (collected  
147 on the studied coast) daily using a pipette to minimize disturbance. We ran the experiment for 18  
148 days until 3 September 2016, although no dogwhelks fed after the thirteenth day. We measured  
149 handling time from the moment when a dogwhelk mounted its prey to the moment when the  
150 dogwhelk moved away from the formed borehole (or, in one case, when the mussel shell was  
151 empty – see Results). To confirm that shell thickening was higher in the consumed cue-exposed  
152 mussels than in the consumed mussels not exposed to cues, we measured shell thickness around  
153 the borehole of each consumed mussel. Finally, to evaluate if dogwhelks bore into a shell at  
154 points of reduced thickness, for each consumed mussel we also measured shell thickness at five  
155 intact random points on the shell.

## 156 **Data analyses**

157 We tested the effects of dogwhelk cues (fixed factor with two levels: dogwhelk presence  
158 and absence) on shell thickness at the lip, centre, and base of mussel shells, on mussel relative  
159 length increment, on mussel shell mass, and on mussel soft tissue dry mass through separate  
160 analyses of variance (ANOVAs) appropriate for a randomized complete block design with  
161 replicated treatments within blocks (random factor with 15 levels). The assumptions of normality



162 and homoscedasticity were tested for each variable with the Kolmogorov-Smirnov test and  
163 Cochran's *C*-test, respectively (Quinn & Keough 2002). Such assumptions were met using the  
164 raw data for relative length increment, shell mass, and thickness at the centre of the shell, and  
165 using square-root-transformed data for thickness at the lip and base of the shell and soft tissue  
166 dry mass. We compared dogwhelk handling time and mussel shell thickness at the borehole  
167 between cue-exposed mussels and mussels without a previous cue exposure through  
168 independent-samples *t*-tests. Separately for each cue treatment, we compared shell thickness  
169 between the borehole area and intact shell areas (mean of the five measurements per mussel)  
170 through a paired-samples *t*-test. We did these analyses with STATISTICA 12.5 (Statsoft, Tulsa,  
171 OK, USA).

## 172 **RESULTS**

173 At the intertidal zone, waterborne dogwhelk cues elicited an increase in the thickness of the  
174 lip, centre, and base of mussel shells but a slower growth in terms of length (Table 1, Fig. 2).  
175 Relative to the no-cue treatment, mean thickness in the presence of cues increased more (87 %)   
176 in thinner areas of the shell (lip) than in thicker areas (32 % increase at the shell centre and 47 %  
177 at the shell base; Fig. 2). Neither the mass of mussel shells nor the dry mass of mussel soft  
178 tissues was affected by dogwhelk cues (Table 1, Fig. 2). The blocks factor was only significant  
179 in one case (relative length increment, Table 1), but that result merely indicates that relative  
180 length increment varied among blocks. The important result is that the interaction between the  
181 dogwhelks factor and the blocks factor was not significant for any case, indicating that the  
182 presence or absence of NCEs, depending on the case as described above, was spatially  
183 consistent.

184 In the lab experiment, 16 dogwhelks consumed their provided mussel by drilling a hole in  
185 the mussel's shell. One dogwhelk waited for its mussel to gape to then insert its proboscis  
186 through the opening, while the remaining tested dogwhelks made no apparent attempt to feed.  
187 The drilling dogwhelks needed a longer handling time to consume mussels previously exposed to  
188 dogwhelk cues compared with mussels without a cue exposure ( $t_{12} = 1.91$ ,  $p = 0.040$ ; Fig. 3).  
189 Data for two drilling dogwhelks could not be used for that  $t$ -test because such dogwhelks started  
190 to handle their respective mussel during a short initial period when the camera did not record  
191 images. Handling time was accurately calculated for all of the other dogwhelks. Shell thickness  
192 at the borehole was higher in mussels previously exposed to dogwhelk cues than in mussels  
193 without a previous cue exposure ( $t_{14} = 5.02$ ,  $p < 0.001$ ; Fig. 3). Shell thickness at the borehole  
194 was lower than at intact parts of the shell regardless of previous cue exposure ( $t_8 = 5.50$ ,  $p <$   
195  $0.001$  for cue-exposed mussels and  $t_6 = 4.89$ ,  $p = 0.003$  for mussels not previously exposed to  
196 cues; Fig. 3). Six mussels released gametes to the water soon after a dogwhelk was introduced in  
197 the container.

## 198 DISCUSSION

199 The present study has revealed that mussels in natural environments respond to dogwhelk  
200 cues by thickening their shells, although simultaneously limiting linear shell growth. Since the  
201 mass of mussel shells was not affected by dogwhelk presence, a trade-off between shell  
202 thickening and elongation was identified. Such a plastic trade-off has been observed for mussels  
203 in general in response to crab cues (Reimer & Tedengren 1997, Leonard et al. 1999, Freeman  
204 2007, Shin et al. 2009, Lowen et al. 2013, Naddafi & Rudstrom 2014) and cues from other  
205 whelks (Smith & Jennings 2000, Freeman 2007). For other bivalves (i.e., oysters), changes in  
206 shell thickness come at a cost to soft tissue growth (Robinson et al. 2014). However, there has

207 been no indication of such a trade-off for mussels (Reimer & Tedengren 1997, Cheung et al.  
208 2004, Babarro et al. 2016) and the lack of dogwhelk effects on mussel soft tissue mass in our  
209 study supports that notion. Besides their NCEs on mussel shells, dogwhelks also triggered short-  
210 term responses, as some mussels exhibited a broadcast reproductive response to direct predatory  
211 threat in the lab experiment. Such a response may have been a last attempt by mussels to spawn,  
212 which aligns with findings that *Mytilus edulis* reacts to predator cues by escalating short-term  
213 investments in reproductive output (Reimer 1999).

214 This study also confirms that induced shell thickening in mussels occurs throughout the  
215 entire shell (Leonard et al. 1999) and it shows for the first time that thickening varies across the  
216 shell. Thickening resulting from exposure to dogwhelk cues was most pronounced in thinner  
217 areas of the shell, which are potentially most vulnerable to drilling by predators. Despite the  
218 overall thickening of mussel shells, however, dogwhelks were still able to find the thinnest part  
219 to drill, as shell thickness at the borehole was lower than at intact parts of the shell.

220 The functional significance of the plastic response in mussels observed in the field was  
221 revealed by the lab experiment as, on average, dogwhelks took 55 % longer to handle to full  
222 consumption mussels that had been exposed to dogwhelk cues and, hence, had thicker shells.  
223 These results show for the first time that predator-induced shell thickening in mussels hinders the  
224 feeding of drilling predators. Induced morphological defenses in mussels also increase handling  
225 time for predatory crabs (Boulding 1984, Reimer & Tedengren 1997, Freeman 2007) and sea  
226 stars (Norberg & Tedengren 1995, Freeman 2007). However, comparable proportional increases  
227 in handling time may be more detrimental for dogwhelks. The regular handling time required for  
228 dogwhelks to drill into mussels is considerably longer than for crabs and sea stars to crush or pry  
229 open a mussel (Freeman 2007, Miller 2013). Thus, a similar proportional increase in handling

230 time would expose dogwhelks considerably longer than those predators to desiccation stress  
231 (Hughes & Dunkin 1984, Davenport & MacAlister 1996), to competitors that can displace a  
232 feeding dogwhelk (Hughes & Dunkin 1984, Quinn et al. 2012, Chattopadhyay & Baumiller  
233 2007, Hutchings & Herbert 2013), to predators (Vadas et al. 1994), to entrapment by neighboring  
234 mussels (Davenport et al. 1996, Farrell & Crowe 2007), and to dislodgement by waves (Denny  
235 1988). Thus, the morphological alterations that increase the time a mussel is handled by a  
236 dogwhelk should increase the likelihood that the mussel survives a predation attempt.

237 Future research could investigate if the dogwhelk-induced responses differ to some extent  
238 between *Mytilus edulis* and *M. trossulus*. Recent research has found that *M. edulis* exhibits  
239 stronger morphological responses to crab and sea star cues than *M. trossulus* (Lowen et al. 2013),  
240 but this may not be the case when presented with more reliable cues from slower-moving  
241 predators such as dogwhelks (Burrows & Hughes 1991). Since cue release by dogwhelks  
242 increases their vulnerability to byssal entrapment by mussels (Farrell & Crowe 2007) and elicits  
243 prey structural changes that reduce feeding success, future studies could also investigate  
244 behavioural adaptations of dogwhelks to begin feeding during low tides to delay cue  
245 dissemination in the water.

246 Overall, this is the first study that has used organisms raised in the field, rather than in the  
247 lab, to demonstrate that predator-induced morphological responses in bivalve prey hinder  
248 predation. The complex abiotic and biotic conditions of intertidal environments, almost  
249 impossible to replicate in a lab, conferred a high degree of realism to the results from the field  
250 experiment and the organisms used for the feeding assay. This approach is thus in line with  
251 recent studies that have highlighted the need to understand NCEs under realistic conditions in  
252 order to improve theory development (Weissburg et al. 2014, Babarro et al. 2016).



- 274 Burrows MT, Hughes RN (1991) Variation in foraging behavior among individuals and  
275 populations of dogwhelks, *Nucella lapillus*: natural constraints on energy intake. *J Anim Ecol*  
276 60:497–514
- 277 Caro AU, Castilla JC (2004) Predator-inducible defenses and local intra-population variability of  
278 the intertidal mussel *Semimytilus algosus* in central Chile. *Mar Ecol Prog Ser* 276:115–123
- 279 Chattopadhyay D, Baumiller TK (2007) Drilling under threat: an experimental assessment of the  
280 drilling behavior of *Nucella lamellosa* in the presence of a predator. *J Exp Mar Biol Ecol*  
281 352:257–266
- 282 Cheung SG, Lam S, Gao QF, Mak KK, Shin PKS (2004) Induced anti-predator responses of the  
283 green mussel, *Perna viridis* (L.), on exposure to the predatory gastropod, *Thais clavigera*  
284 Kuster, and the swimming crab, *Thalamita danae* Stimpson. *Mar Biol* 144:675–684
- 285 Côté IM (1995) Effects of predatory crab effluent on byssus production in mussels. *J Exp Mar*  
286 *Biol Ecol* 188:233–241
- 287 Davenport J, MacAlister H (1996) Environmental conditions and physiological tolerances of  
288 intertidal fauna in relation to shore zonation at Husvik, South Georgia. *J Mar Biol Assoc U K*  
289 76:985–1002
- 290 Davenport J, Moore PG, LeComte E (1996) Observations on defensive interactions between  
291 predatory dogwhelks, *Nucella lapillus* (L.), and mussels, *Mytilus edulis* L. *J Exp Mar Biol Ecol*  
292 206:133–147
- 293 Denny MW (1988) *Biology and the mechanics of the wave swept environment*. Princeton  
294 University Press, Princeton

- 295 Ellrich JA, Scrosati RA, Molis M (2015) Predator nonconsumptive effects on prey recruitment  
296 weaken with recruit density. *Ecology* 96:611–616
- 297 Ellrich JA, Scrosati RA (2016) Water motion modulates predator nonconsumptive limitation of  
298 prey recruitment. *Ecosphere* 7:e01402
- 299 Farrell ED, Crowe TP (2007) The use of byssus threads by *Mytilus edulis* as an active defense  
300 against *Nucella lapillus*. *J Mar Biol Assoc U K* 87:559–564
- 301 Ferrari MCO, Wisenden BD, Chivers DP (2010) Chemical ecology of predator–prey interactions  
302 in aquatic ecosystems: a review and prospectus. *Can J Zool* 88:698–724
- 303 Freeman AS (2007) Specificity of induced defenses in *Mytilus edulis* and asymmetrical predator  
304 deterrence. *Mar Ecol Prog Ser* 334:145–153
- 305 Freeman AS, Byers JE (2006) Divergent induced responses to an invasive predator in marine  
306 mussel populations. *Science* 313:831–833
- 307 Hagen NT, Andersen A, Stabell OB (2002) Alarm responses of green sea urchin,  
308 *Strongylocentrotus droebachiensis*, induced by chemically labeled durophagous predators and  
309 simulated acts of predation. *Mar Biol* 140:365–374
- 310 Hughes RN, Drewett D (1985) A comparison of foraging behavior of dogwhelks, *Nucella*  
311 *lapillus* (L.), feeding on barnacles or mussels on the shore. *J Mollusc Stud* 51:73–77
- 312 Hughes RN, Dunkin S (1984) Behavioral components of prey selection by dogwhelks, *Nucella*  
313 *lapillus* (L.), feeding on mussels, *Mytilus edulis* L., in the laboratory. *J Exp Mar Biol Ecol*  
314 77:45–68
- 315 Hunt HL, Scheibling RE (2001) Patch dynamics of mussels on rocky shores: integrating process  
316 to understand pattern. *Ecology* 82:3213–3231

- 317 Hutchings JA, Herbert GS (2013) No honor among snails: conspecific competition leads to  
318 incomplete drill holes by a naticid gastropod. *Palaeogeogr Palaeoclimatol Palaeoecol* 379–  
319 380:32–38
- 320 Keppel E, Scrosati R (2004) Chemically mediated avoidance of *Hemigrapsus nudus* (Crustacea)  
321 by *Littorina scutulata* (Gastropoda): effects of species coexistence and variable cues. *Anim*  
322 *Behav* 68:915–920
- 323 Largen MJ (1967) The diet of the dog-whelk, *Nucella lapillus* (Gastropoda Prosobranchia). *J*  
324 *Zool* 151:123-127
- 325 Leonard GH, Bertness MD, Yund PO (1999) Crab predation, waterborne cues, and inducible  
326 defenses in the blue mussel, *Mytilus edulis*. *Ecology* 80:1–14
- 327 Lord JP, Whitlatch RB (2012) Inducible defenses in the eastern oyster *Crassostrea virginica*  
328 Gmelin in response to the presence of the predatory oyster drill *Urosalpinx cinerea* Say in Long  
329 Island Sound. *Mar Biol* 159:1177–1182
- 330 Lowen JB, Innes DJ, Thompson RJ (2013) Predator-induced defenses differ between sympatric  
331 *Mytilus edulis* and *M. trossulus*. *Mar Ecol Prog Ser* 475:135–143
- 332 Matassa CM, Donelan SC, Luttbegg B, Trussell GC (2016) Resource levels and prey state  
333 influence antipredator behavior and the strength of nonconsumptive predator effects. *Oikos*  
334 125:1478–1488
- 335 Miller LP (2013) The effect of water temperature on drilling and ingestion rates of the dogwhelk  
336 *Nucella lapillus* feeding on *Mytilus edulis* mussels in the laboratory. *Mar Biol* 160:1489–1496



- 337 Molis M, Preuss I, Firmenich A, Ellrich J (2011) Predation risk indirectly enhances survival of  
338 seaweed recruits but not intraspecific competition in an intermediate herbivore species. *J Ecol*  
339 99:807–817
- 340 Naddafi R, Rudstam LG (2014) Predator-induced morphological defenses in two invasive  
341 dreissenid mussels: implications for species replacement. *Freshwat Biol* 59:703–713
- 342 Nakaoka M (2000) Nonlethal effects of predators on prey populations: predator-mediated change  
343 in bivalve growth. *Ecology* 81:1031–1045
- 344 Newell RIE, Kennedy VS, Shaw KS (2007) Comparative vulnerability to predators, and induced  
345 defense responses, of eastern oysters *Crassostrea virginica* and non-native *Crassostrea*  
346 *ariakensis* oysters in Chesapeake Bay. *Mar Biol* 152:449–460
- 347 Norberg J, Tedengren M (1995) Attack behavior and predatory success of *Asterias rubens* L.  
348 related to differences in size and morphology of the mussel *Mytilus edulis* L. *J Exp Mar Biol*  
349 *Ecol* 186:207–220
- 350 Quinn BK, Boudreau MR, Hamilton DJ (2012) Inter- and intraspecific interactions among green  
351 crabs (*Carcinus maenas*) and whelks (*Nucella lapillus*) foraging on blue mussels (*Mytilus*  
352 *edulis*). *J Exp Mar Biol Ecol* 412:117–125
- 353 Quinn GP, Keough MJ (2002) Experimental design and data analysis for biologists. Cambridge  
354 University Press, Cambridge
- 355 Reimer O (1999) Increased gonad ratio in blue mussel, *Mytilus edulis*, exposed to starfish  
356 predators. *Aquat Ecol* 33:185–192
- 357 Reimer O, Harms-Ringdahl S (2001) Predator-inducible changes in blues mussels from the  
358 predator-free Baltic Sea. *Mar Biol* 139:959–965

- 359 Reimer O, Tedengren M (1996) Phenotypical improvements of morphological defenses in the  
360 mussel *Mytilus edulis* induced by exposure to the predator *Asterias rubens*. *Oikos* 75:383–390
- 361 Reimer O, Tedengren M (1997) Predator-induced changes in byssal attachment, aggregation, and  
362 migration in the blue mussel, *Mytilus edulis*. *Mar Fresh Behav Physiol* 30:251–266
- 363 Robinson EM, Lunt J, Marshall CD, Smee DL (2014) Eastern oysters *Crassostrea virginica*  
364 deter crab predators by altering their morphology in response to crab cues. *Aquat Biol* 20:111–  
365 118
- 366 Schoeppner NM, Relyea RA (2005) Damage, digestion, and defense: the roles of alarm cues and  
367 kairomones for inducing prey defenses. *Ecol Lett* 8:505–512
- 368 Scrosati R, Heaven C (2007) Spatial trends in community richness, diversity, and evenness  
369 across rocky intertidal environmental stress gradients in eastern Canada. *Mar Ecol Prog Ser*  
370 342:1–14
- 371 Shin PKS, Yang FY, Chiu MY, Cheung SG (2009) Cues from the predator crab *Thalamita danae*  
372 fed different prey can affect scope for growth in the prey mussel *Perna viridis*. *Mar Fresh*  
373 *Behav Physiol* 42:343–355
- 374 Smith LD, Jennings JA (2000) Induced defensive responses by the bivalve *Mytilus edulis* to  
375 predators with different attack modes. *Mar Biol* 136:461–469
- 376 Tam JC, Scrosati RA (2014) Distribution of cryptic mussel species (*Mytilus edulis* and *M.*  
377 *trossulus*) along wave exposure gradients on northwest Atlantic rocky shores. *Mar Biol Res*  
378 10:51–60

- 379 Vadas RL, Burrows MT, Hughes RN (1994) Foraging strategies of dogwhelks, *Nucella lapillus*  
380 (L.): interacting effects of age, diet, and chemical cues to the threat of predation. *Oecologia*  
381 100:439–450
- 382 Wang Y, Hu M, Shin PKS, Cheung SG (2010) Induction of anti-predator responses in green-  
383 lipped mussel *Perna viridis* under hypoxia. *Mar Biol* 157:747–754
- 384 Weissburg M, Beauvais J (2015) The smell of success: the amount of prey consumed by  
385 predators determines the strength and range of cascading non-consumptive effects. *PeerJ*  
386 3:e1426
- 387 Weissburg M, Smee DL, Ferner MC (2014) The sensory ecology of nonconsumptive predator  
388 effects. *Am Nat* 184:141–157
- 389

389 **Table 1.** Summary results of the analyses of variance conducted to evaluate the effects of  
 390 dogwhelk cues on various mussel traits through a field experiment.

|                                  | SS    | df | MS    | <i>F</i> | <i>p</i> |
|----------------------------------|-------|----|-------|----------|----------|
| <b>Shell thickness (lip)</b>     |       |    |       |          |          |
| Dogwhelks                        | 0.696 | 1  | 0.696 | 61.56    | < 0.001  |
| Blocks                           | 0.173 | 14 | 0.012 | 1.09     | 0.437    |
| Dogwhelks x Blocks               | 0.158 | 14 | 0.011 | 1.34     | 0.240    |
| Residual                         | 0.252 | 30 | 0.008 |          |          |
| <b>Shell thickness (centre)</b>  |       |    |       |          |          |
| Dogwhelks                        | 0.267 | 1  | 0.267 | 10.11    | 0.007    |
| Blocks                           | 0.334 | 14 | 0.024 | 0.90     | 0.574    |
| Dogwhelks x Blocks               | 0.370 | 14 | 0.026 | 1.45     | 0.190    |
| Residual                         | 0.545 | 30 | 0.018 |          |          |
| <b>Shell thickness (base)</b>    |       |    |       |          |          |
| Dogwhelks                        | 0.300 | 1  | 0.300 | 21.00    | < 0.001  |
| Blocks                           | 0.094 | 14 | 0.007 | 0.47     | 0.915    |
| Dogwhelks x Blocks               | 0.200 | 14 | 0.014 | 1.25     | 0.292    |
| Residual                         | 0.342 | 30 | 0.011 |          |          |
| <b>Relative length increment</b> |       |    |       |          |          |
| Dogwhelks                        | 0.019 | 1  | 0.019 | 18.53    | < 0.001  |
| Blocks                           | 0.142 | 14 | 0.010 | 9.65     | < 0.001  |
| Dogwhelks x Blocks               | 0.015 | 14 | 0.001 | 0.25     | 0.996    |
| Residual                         | 0.128 | 30 | 0.004 |          |          |
| <b>Shell mass</b>                |       |    |       |          |          |
| Dogwhelks                        | 0.020 | 1  | 0.021 | 1.02     | 0.329    |
| Blocks                           | 0.284 | 14 | 0.020 | 1.00     | 0.504    |
| Dogwhelks x Blocks               | 0.285 | 14 | 0.020 | 1.00     | 0.479    |
| Residual                         | 0.612 | 30 | 0.020 |          |          |
| <b>Soft tissue dry mass</b>      |       |    |       |          |          |
| Dogwhelks                        | 0.001 | 1  | 0.001 | 0.87     | 0.368    |
| Blocks                           | 0.014 | 14 | 0.001 | 0.91     | 0.567    |
| Dogwhelks x Blocks               | 0.015 | 14 | 0.001 | 0.95     | 0.526    |
| Residual                         | 0.034 | 30 | 0.001 |          |          |

391

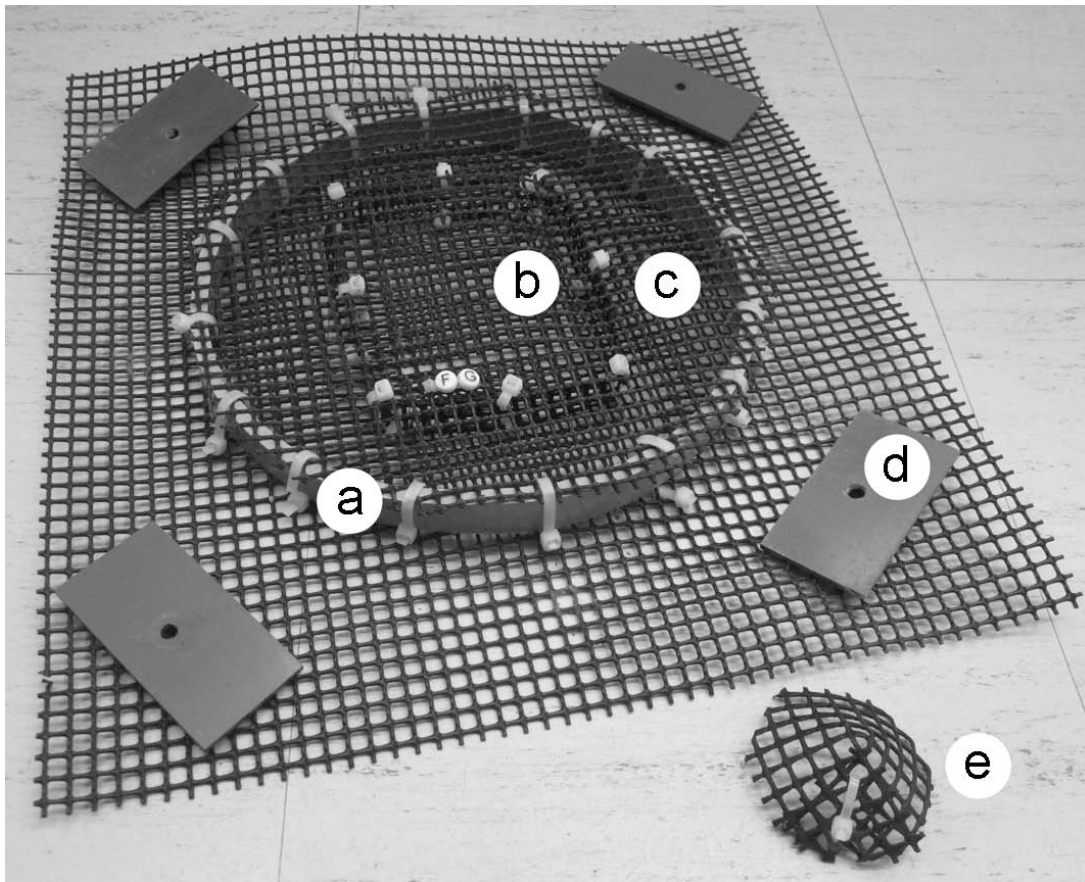

392

393

394 **Fig. 1.** Experimental cage, showing (a) the outer PVC ring, (b) the central compartment, (c) the  
395 peripheral compartment, (d) one of the four PVC tiles used to keep the cage attached to the  
396 intertidal substrate, and (e) the conical compartment that was kept inside the central  
397 compartment holding two experimental mussels during the experiment. The PVC ring is 25 cm  
398 in diameter and 2.5 cm tall.

399

399

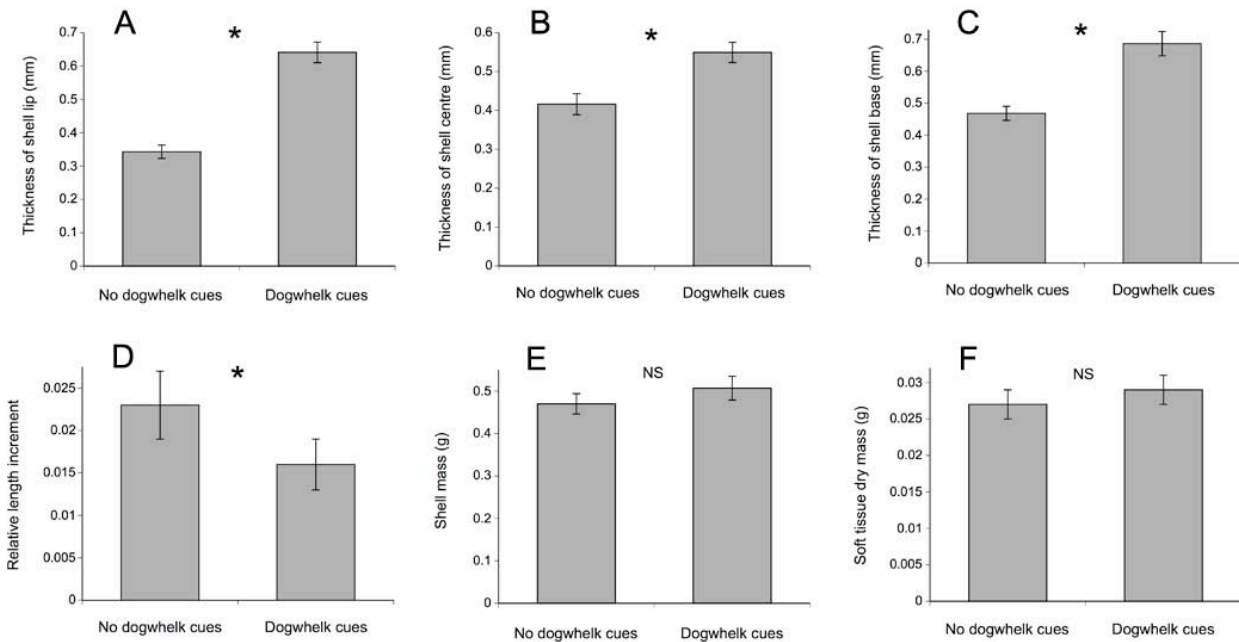

400

401

402 **Fig. 2.** Mussel traits (mean ± SE) depending on the presence or absence of dogwhelk cues:

403 (A) thickness at the lip, (B) centre, and (C) base of mussel shells, (D) relative length increment

404 of shells, (E) shell mass, and (F) soft tissue dry mass. Asterisks indicate a significant difference

405 between both treatments, whereas "NS" indicates a nonsignificant result.

406

406

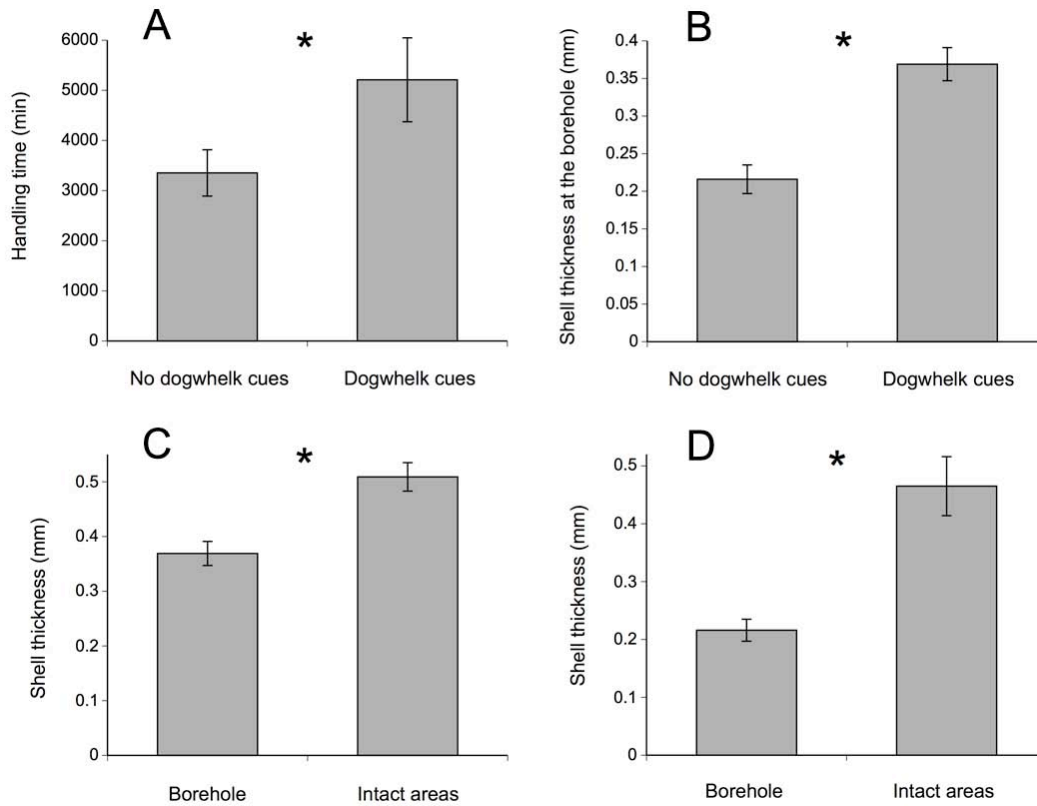

407

408

409 **Fig. 3.** (A) Handling time by dogwhelks (mean  $\pm$  SE) and (B) shell thickness at the borehole of  
410 mussels previously exposed to dogwhelk cues and mussels not exposed to such cues. Shell  
411 thickness at the borehole and at intact shell areas of mussels (C) previously exposed to  
412 dogwhelk cues and (D) mussels not exposed to such cues. Asterisks indicate a significant  
413 difference between both treatments.
